# Supplementary material
Source: PubMed Central journal article supplement (PMC8760162)
Supplement: NIHMS1768235-supplement-1.pdf [file NIHMS1768235-supplement-1.pdf]

## Supplemental Materials

**Supplemental Table 1.** Significant MuV-specific immune outcomes associated with demographic and clinical characteristics for the entire cohort.

| Variable                                   | Immune Outcome | P - value |
|--------------------------------------------|----------------|-----------|
| Age at Enrollment                          | IL-2           | 0.003     |
|                                            | IFN $\gamma$   | 0.011     |
|                                            | IP-10          | 0.046     |
|                                            | MCP-1          | 0.009     |
| Age at First MMR Vaccination               | NA             | NS        |
| Age at Second MMR Vaccination              | MIP-1 $\alpha$ | 5.1e -05  |
|                                            | MIP-1 $\beta$  | 0.001     |
| Time from Second Vaccination to Enrollment | MIP-1 $\alpha$ | 0.0003    |
|                                            | MIP-1 $\beta$  | 0.014     |
| Sex                                        |                |           |

|                                |                       |         |
|--------------------------------|-----------------------|---------|
|                                | Neutralizing antibody | 0.099   |
|                                | IFN $\gamma$          | 0.031   |
|                                | TNF $\alpha$          | 0.0003  |
|                                | IL-1 $\beta$          | 0.032   |
|                                | IL-6                  | 0.028   |
|                                | MIP-1 $\alpha$        | 4.4e-05 |
|                                | MIP-1 $\beta$         | 0.001   |
| <b>Self-Reported Ethnicity</b> |                       |         |
| Not Hispanic                   | NA                    | NS      |
| Hispanic                       | NA                    | NS      |
| Unknown                        | NA                    | NS      |

NA – not applicable, NS – not significant

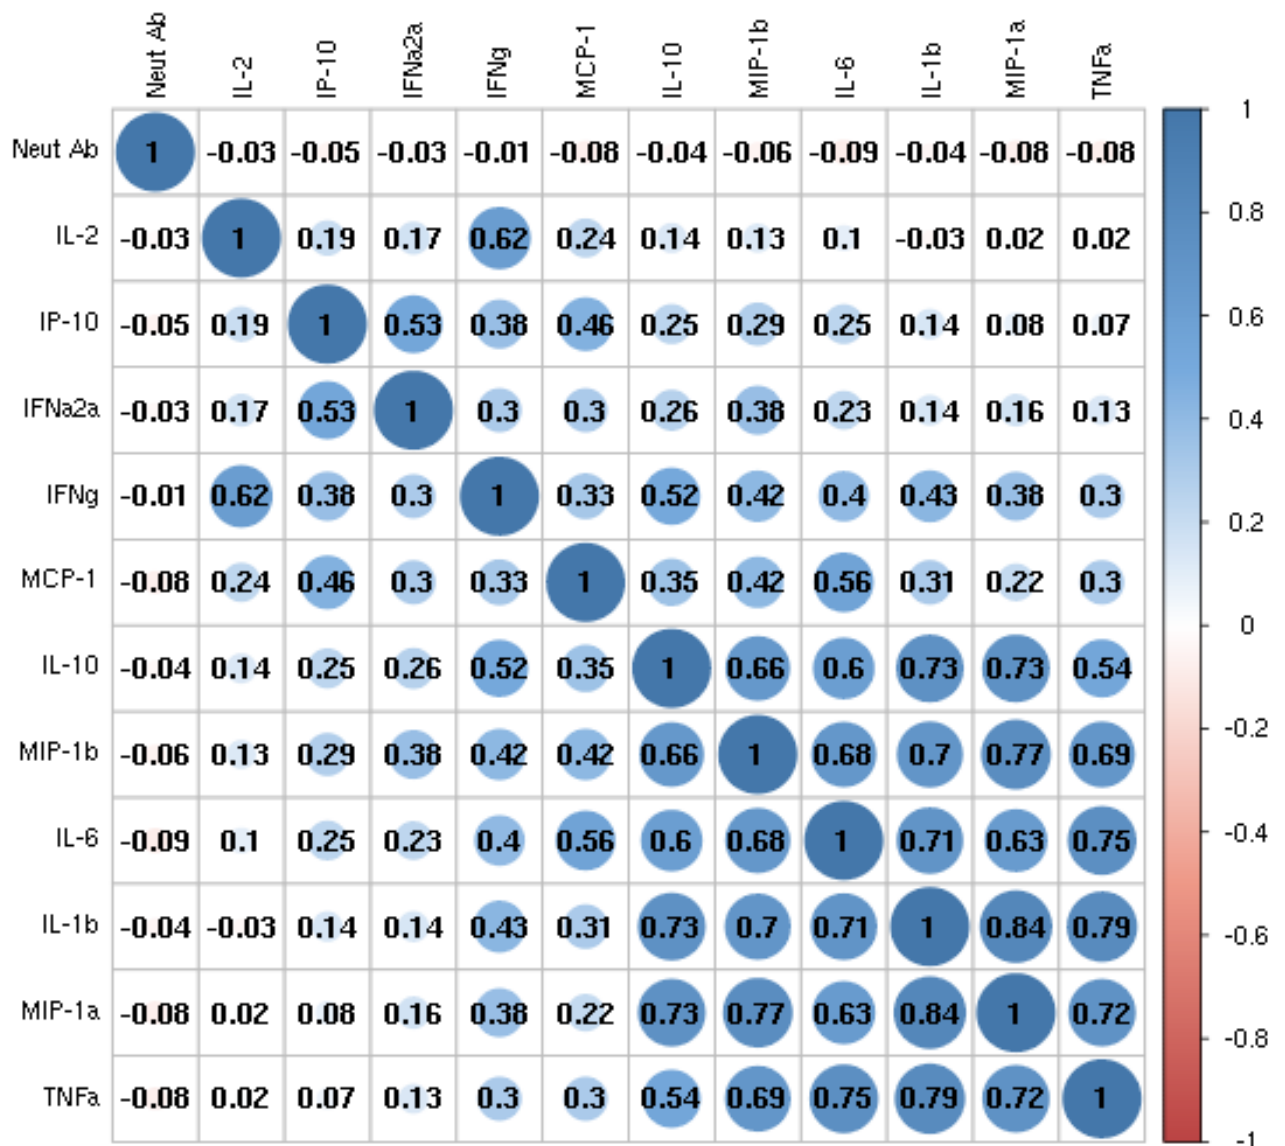

**Supplemental Figure 1.** MuV-specific immune outcome pairwise correlation plot. Pearson's correlation coefficient ( $r$ ) values are indicated.  $r$  values  $>0$ , positively correlated, are indicated in blue;  $r$  values  $<0$ , negatively correlated, are indicated in red.

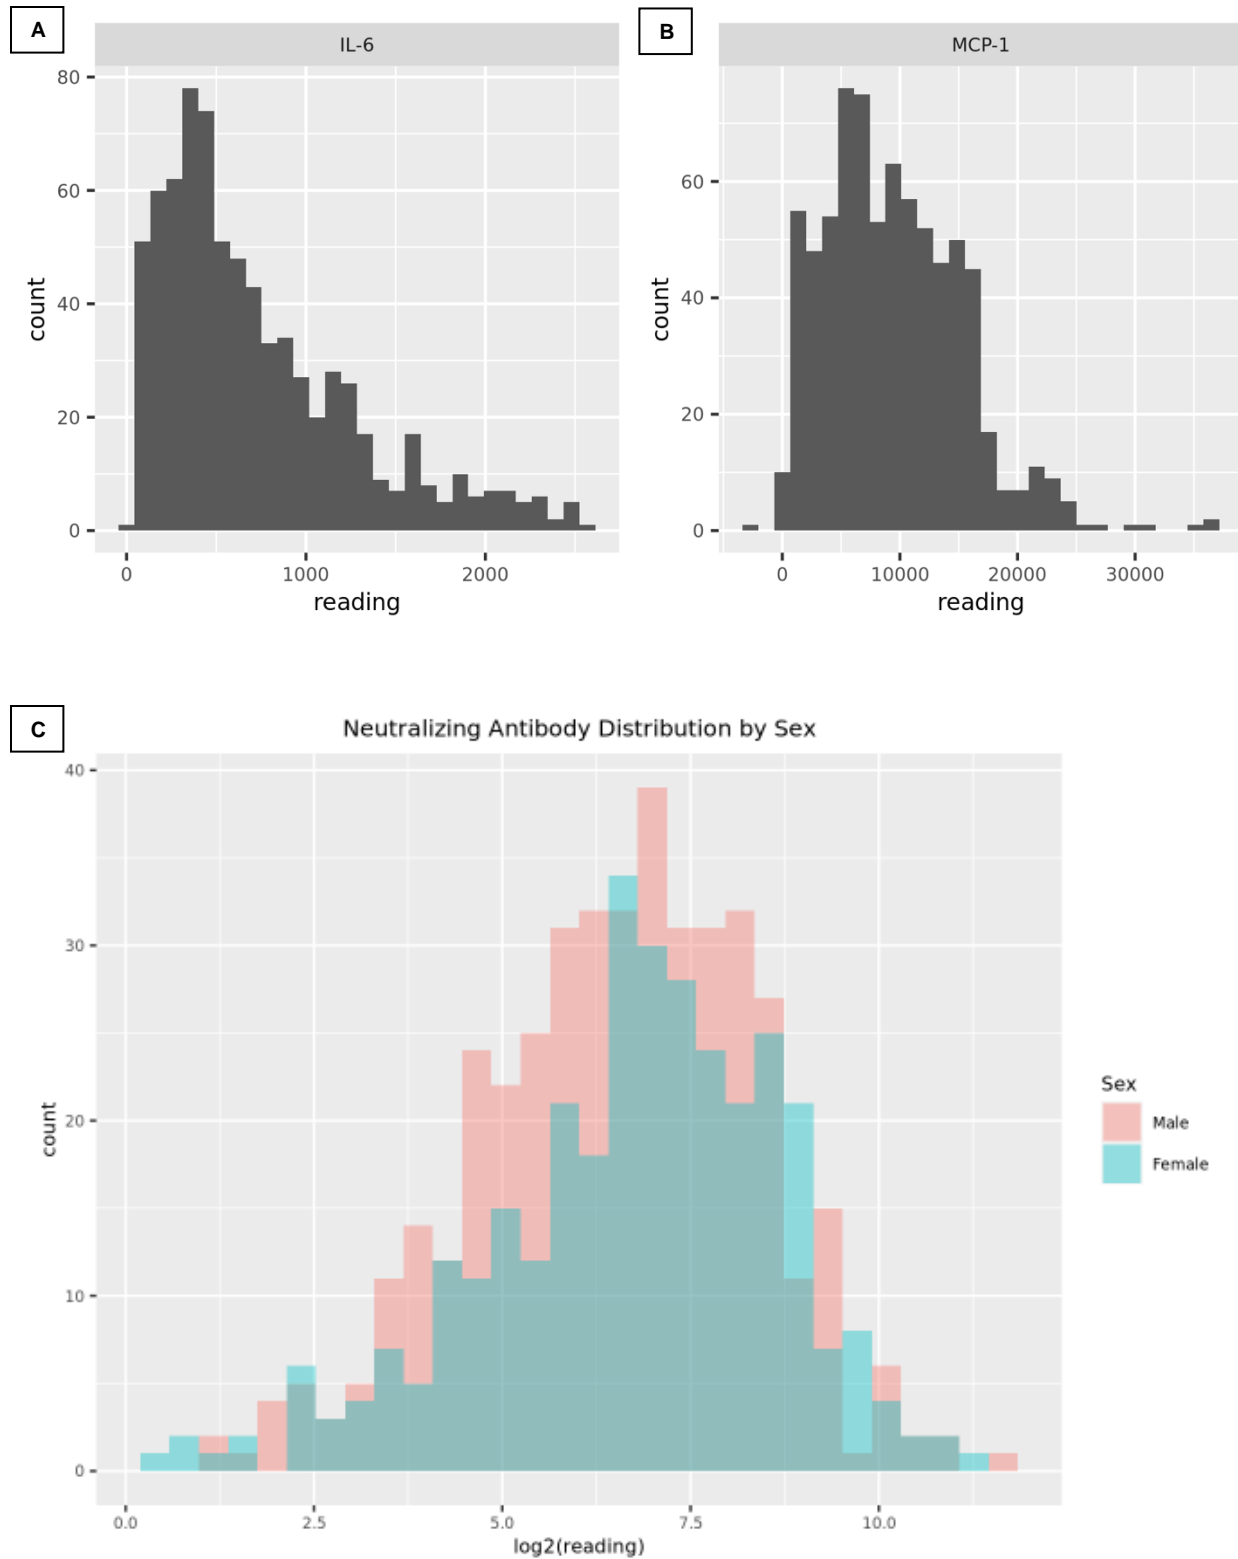

**Supplemental Figure 2.** (A) IL-6 MuV-specific cell-mediated distributions (stim-unstim) for entire cohort. (B) MCP-1 MuV-specific cell-mediated distributions (stim-unstim) for entire cohort. (C) MuV-specific neutralizing antibody overlaid histogram transformed on Log2. Use only to assess distribution, as there are more men than women in the cohort.

Supplemental Figure 3. Mumps-specific Immune Outcomes in Females

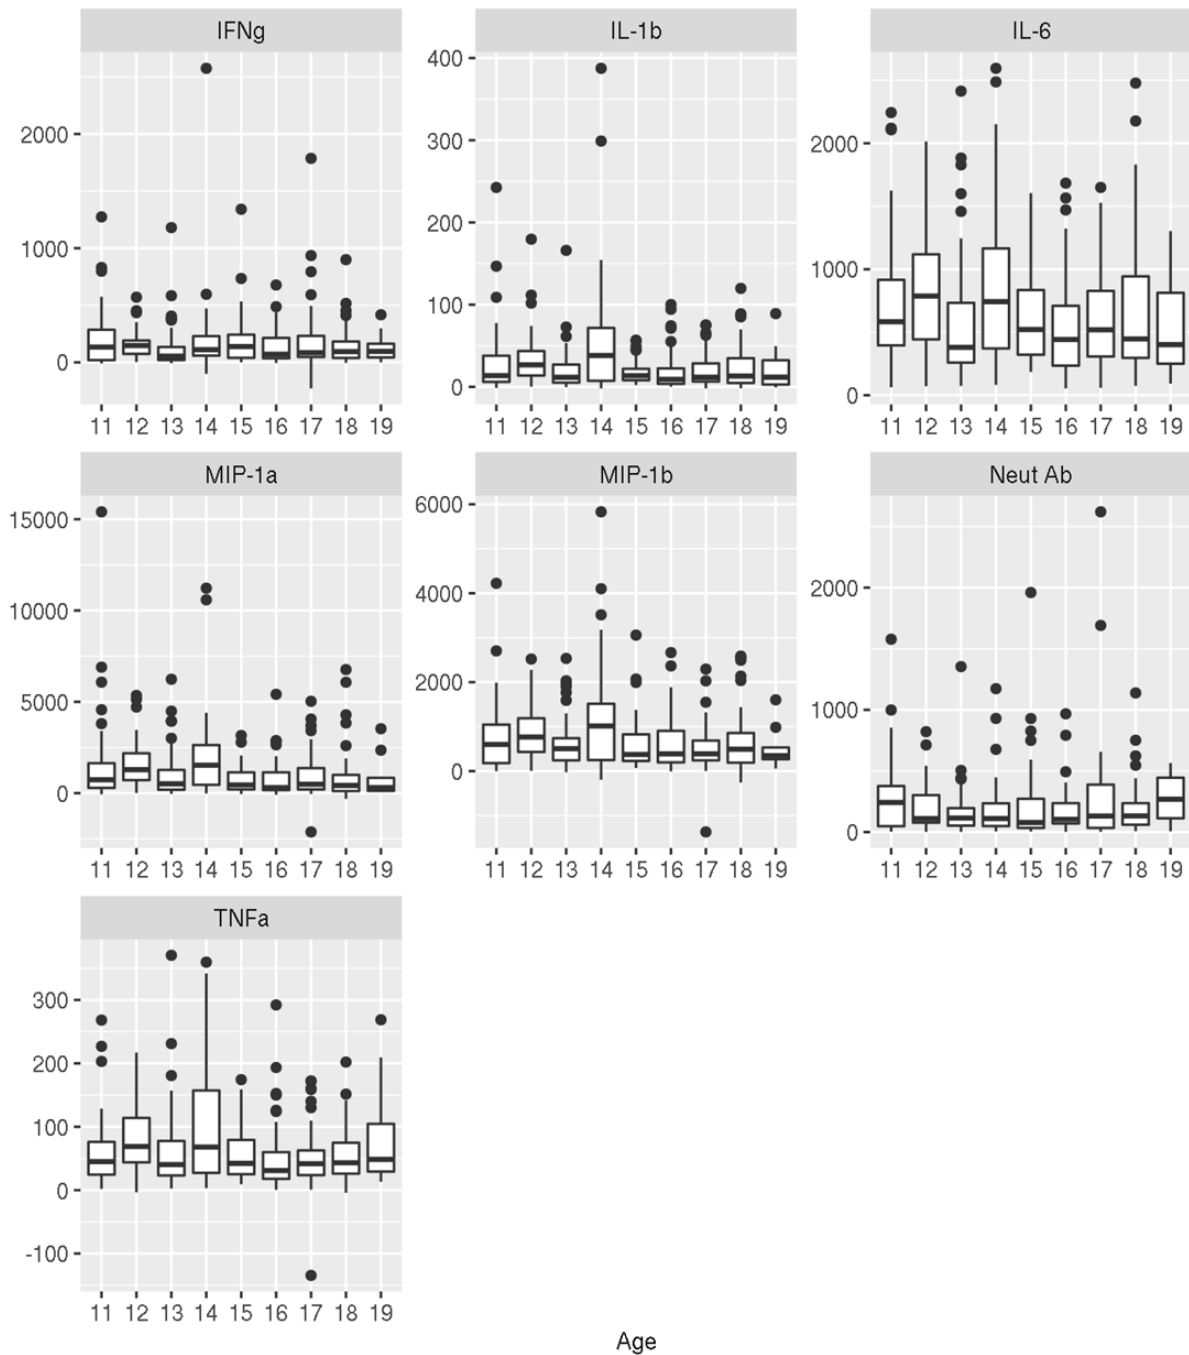

Supplemental Figure 3. Female participants were divided into 1 year age bins to evaluate mumps-specific immune responses by age. The solid dark line in each plot represents the median secretion of the indicated chemokine or cytokine. The upper and lower bound of the box represent the upper and lower quartile. The whiskers extend to down to the 10<sup>th</sup> percentile and up to the 90<sup>th</sup> percentile.

Supplemental Figure 4. Mumps-specific Immune Outcomes in Males

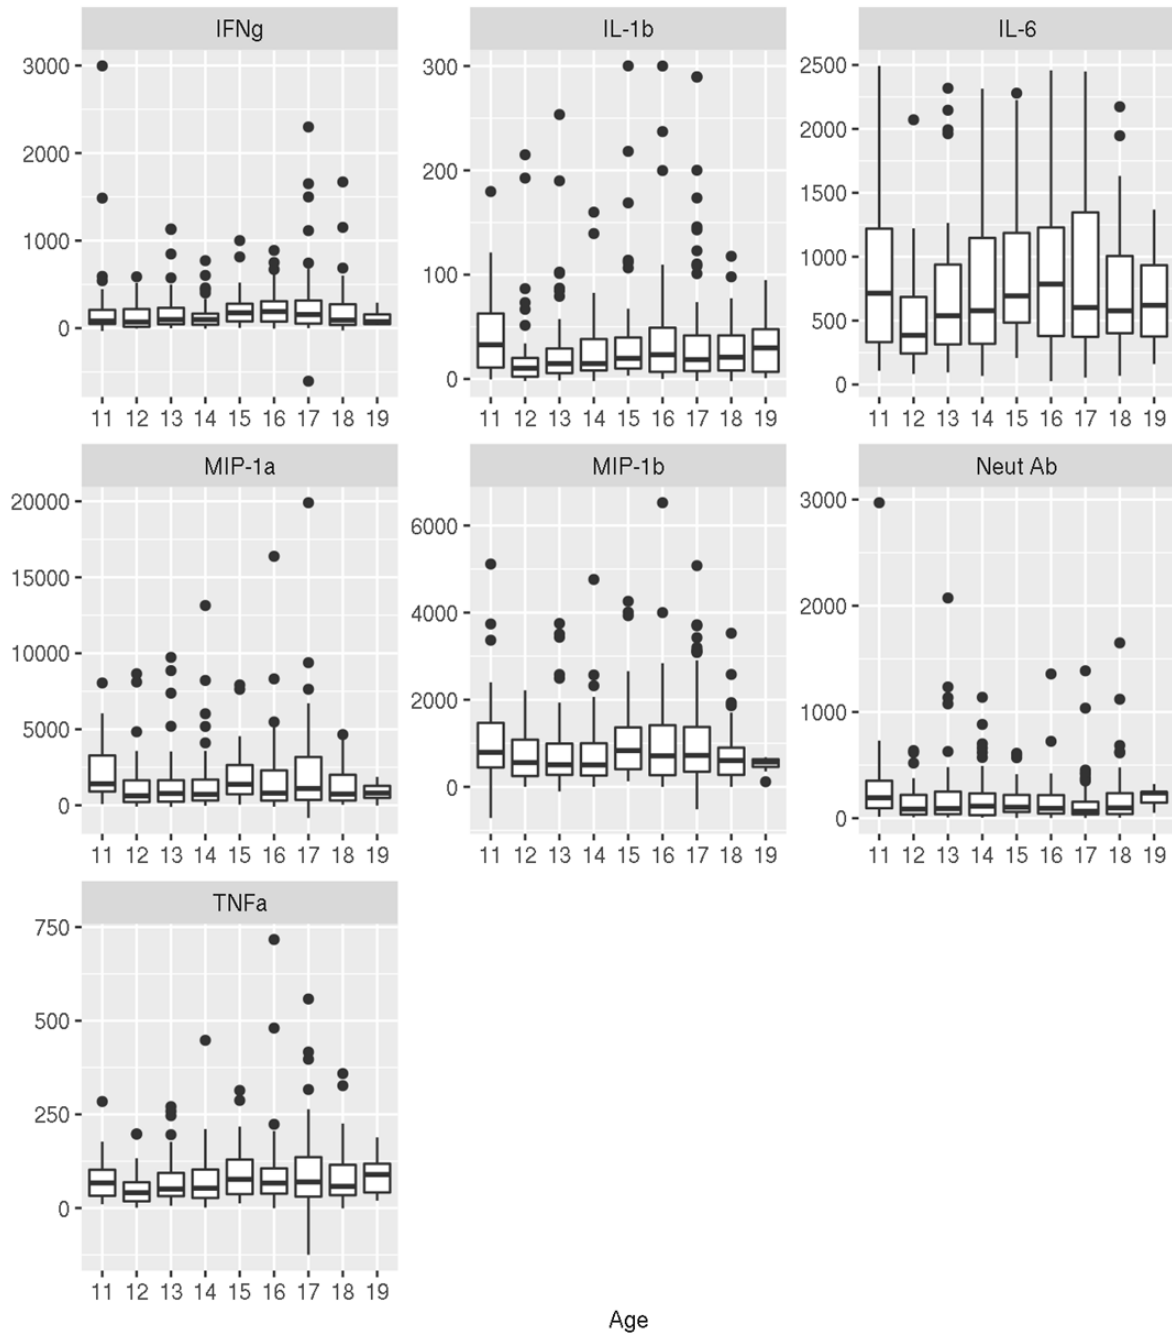

Supplemental Figure 4. Male participants were divided into 1 year age bins to evaluate mumps-specific immune responses by age. The solid dark line in each plot represents the median secretion of the indicated chemokine or cytokine. The upper and lower bound of the box represent the upper and lower quartile. The whiskers extend to down to the 10<sup>th</sup> percentile and up to the 90<sup>th</sup> percentile.

| <b>Immune Outcome</b> | <b>p-value<br/>Females <math>\leq 12</math> vs <math>\geq 13</math></b> | <b>p-value<br/>Males <math>\leq 14</math> vs <math>\geq 15</math></b> |
|-----------------------|-------------------------------------------------------------------------|-----------------------------------------------------------------------|
| Neutralizing Ab       | 0.12                                                                    | 0.40                                                                  |
| IL-1b                 | 0.019                                                                   | 0.048                                                                 |
| IL-6                  | 0.033                                                                   | 0.006                                                                 |
| IFN $\gamma$          | 0.12                                                                    | 0.001                                                                 |
| MIP-1 $\alpha$        | 0.0024                                                                  | 0.11                                                                  |
| MIP-1 $\beta$         | 0.043                                                                   | 0.045                                                                 |
| TNF $\alpha$          | 0.12                                                                    | 0.0026                                                                |

Immune outcomes in younger and older participants were compared using a two-sided Wilcoxon rank sum test with continuity correction.
